# Supplementary material
Source: PubMed Central journal article supplement (PMC4787869)
Supplement: kins673277.w1_default.pdf [file kins673277.w1_default.pdf]

**Web table 1: Age and Standard of Living Index standardised prevalence (%; 95% CIs) of Non-Communicable Disease Risk Factors in India: Rural Men**

|                                                | North                | South                | Total                | P-value† |
|------------------------------------------------|----------------------|----------------------|----------------------|----------|
| Smoke tobacco <sup>a</sup>                     | 19.6<br>(15.9, 23.2) | 24.0<br>(19.7, 28.3) | 21.8<br>(19.1, 24.4) | 0.050    |
| Chew tobacco <sup>a</sup>                      | 40.3<br>(35.5, 45.1) | 6.8<br>(4.1, 9.5)    | 25.0<br>(21.9, 28.1) | <0.001   |
| Alcohol use <sup>b</sup>                       | 14.0<br>(10.5, 17.4) | 34.0<br>(28.8, 39.2) | 23.4<br>(20.5, 26.2) | <0.001   |
| Low physical activity <sup>c</sup>             | 64.6<br>(60.5, 68.7) | 76.3<br>(71.4, 81.3) | 67.6<br>(64.2, 71.0) | <0.001   |
| Inadequate fruit/vegetable intake <sup>d</sup> | 73.7<br>(69.8, 77.6) | 71.0<br>(65.8, 76.1) | 71.6<br>(68.6, 74.7) | 0.261    |
| BMI ≥ 23 kg/m <sup>2</sup>                     | 20.4<br>(17.4, 23.3) | 27.1<br>(23.2, 31.0) | 23.5<br>(21.2, 25.8) | 0.003    |
| BMI ≥ 25 kg/m <sup>2</sup>                     | 9.9<br>(7.7, 12.1)   | 14.2<br>(11.6, 16.9) | 11.9<br>(10.2, 13.7) | 0.014    |
| Central adiposity <sup>e</sup>                 | 13.4<br>(10.9, 16.0) | 13.6<br>(11.3, 16.0) | 13.5<br>(11.8, 15.2) | 0.910    |
| TC/HDL ≥ 4.5 <sup>f</sup>                      | 21.0<br>(17.3, 24.7) | 33.3<br>(28.7, 37.9) | 27.5<br>(24.6, 30.4) | <0.001   |
| Triglycerides ≥ 1.69mmol/L                     | 20.7<br>(16.8, 24.6) | 24.5<br>(20.2, 28.8) | 23.3<br>(20.5, 26.1) | 0.087    |
| Hypertension <sup>g</sup>                      | 15.5<br>(12.3, 18.6) | 18.7<br>(15.7, 21.7) | 17.2<br>(15.0, 19.4) | 0.112    |
| Diabetes mellitus <sup>h</sup>                 | 3.4<br>(2.0, 4.8)    | 4.4<br>(2.8, 6.0)    | 4.0<br>(3.0, 5.1)    | 0.331    |
| Underweight <sup>i</sup>                       | 33.0<br>(28.3, 37.8) | 21.3<br>(16.3, 26.4) | 28.2<br>(24.9, 31.5) | <0.001   |
| Short stature <sup>j</sup>                     | 24.5<br>(20.2, 28.8) | 20.6<br>(16.2, 24.9) | 23.0<br>(19.9, 26.1) | 0.674    |

<sup>a</sup> Used on a daily basis, anytime in the last 6 months

<sup>b</sup> Alcohol consumed at least 10 days/month, anytime in the last 6 months

<sup>c</sup> PAL (Physical Activity Level) ≤ 1.69

<sup>d</sup> <400g of fruit and vegetables per day

<sup>e</sup> Waist circumference >90cm in males; >85cm in females

<sup>f</sup> Total/HDL cholesterol

<sup>g</sup> Self-reported or blood pressure ≥140/90mm Hg

<sup>h</sup> Self-reported or fasting blood glucose level ≥7mmol/l

<sup>i</sup> Body mass index < 18.5 kg/m<sup>2</sup>; <sup>j</sup> Height <25th percentile of National Family Health Survey-3 (rural) participants<sup>35</sup>

Note: All data are standardised to age and Standard of Living Index distribution of the Indian National Family Health Survey-3 (rural) participants<sup>35</sup>

† p-values were obtained from chi-squared tests

**Web table 2: Age and Standard of Living Index standardised prevalence (%; 95% CIs) of Non-Communicable Disease Risk Factors in India: Rural Women**

|                                                | North                | South                | Total                | P-value |
|------------------------------------------------|----------------------|----------------------|----------------------|---------|
| Smoke tobacco <sup>a</sup>                     | 0.5<br>(0.0, 1.3)    | 0.8<br>(0.0, 1.9)    | 0.9<br>(0.0, 1.8)    | 0.692   |
| Chew tobacco <sup>a</sup>                      | 5.8<br>(3.1, 8.6)    | 5.0<br>(2.9, 7.2)    | 4.9<br>(2.9, 6.9)    | 0.702   |
| Alcohol use <sup>b</sup>                       | 0.2<br>(0.0, 0.7)    | 12.6<br>(7.1, 18.1)  | 6.9<br>(3.9, 9.9)    | <0.001  |
| Low physical activity <sup>c</sup>             | 67.3<br>(61.1, 73.5) | 68.2<br>(62.3, 74.0) | 71.1<br>(65.3, 76.9) | 0.855   |
| Inadequate fruit/vegetable intake <sup>d</sup> | 72.3<br>(65.1, 79.5) | 75.5<br>(69.1, 81.8) | 76.6<br>(71.3, 81.9) | 0.392   |
| BMI $\geq$ 23 kg/m <sup>2</sup>                | 21.9<br>(16.5, 27.4) | 34.8<br>(28.9, 40.7) | 30.3<br>(26.4, 34.3) | <0.001  |
| BMI $\geq$ 25 kg/m <sup>2</sup>                | 12.9<br>(8.7, 17.2)  | 24.0<br>(18.5, 29.6) | 19.8<br>(16.5, 23.2) | 0.001   |
| Central adiposity <sup>e</sup>                 | 7.6<br>(4.2, 10.9)   | 15.4<br>(11.6, 19.1) | 13.2<br>(10.5, 15.8) | 0.008   |
| TC/HDL $\geq$ 4.5 <sup>f</sup>                 | 19.6<br>(13.8, 25.4) | 32.3<br>(27.6, 37.1) | 31.3<br>(27.1, 35.5) | 0.001   |
| Triglycerides $\geq$ 1.69mmol/L                | 15.7<br>(10.6, 20.7) | 29.4<br>(22.1, 36.7) | 25.6<br>(20.6, 30.7) | <0.001  |
| Hypertension <sup>g</sup>                      | 9.3<br>(5.4, 13.2)   | 20.0<br>(16.6, 23.3) | 18.5<br>(15.2, 21.7) | <0.001  |
| Diabetes mellitus <sup>h</sup>                 | 2.5<br>(0.8, 4.2)    | 4.5<br>(2.7, 6.4)    | 4.2<br>(2.6, 5.8)    | 0.199   |
| Underweight <sup>i</sup>                       | 34.4<br>(28.2, 40.6) | 21.7<br>(13.4, 30.1) | 25.0<br>(19.7, 30.4) | <0.001  |
| Short stature <sup>j</sup>                     | 25.7<br>(17.9, 33.5) | 27.0<br>(19.0, 35.0) | 28.3<br>(22.5, 34.1) | 0.699   |

<sup>a</sup> Used on a daily basis, anytime in the last 6 months

<sup>b</sup> Alcohol consumed at least 10 days/month, anytime in the last 6 months

<sup>c</sup> PAL (Physical Activity Level)  $\leq$  1.69

<sup>d</sup> <400g of fruit and vegetables per day

<sup>e</sup> Waist circumference >90cm in males; >85cm in females

<sup>f</sup> Total/HDL cholesterol

<sup>g</sup> Self-reported or blood pressure  $\geq$  140/90mm Hg

<sup>h</sup> Self-reported or fasting blood glucose level  $\geq$  7mmol/l

<sup>i</sup> Body mass index < 18.5 kg/m<sup>2</sup>; <sup>j</sup> Height <25th percentile of National Family Health Survey-3 (rural) participants<sup>35</sup>

Note: All data are standardised to age and Standard of Living Index distribution of the Indian National Family Health Survey-3 (rural) participants<sup>35</sup>

<sup>†</sup> p-values were obtained from chi-squared tests

**Web table 3: Comparison of responder and non-responder factory participants**

|                                                                                    | Participants<br>(n=1980) | Non participants<br>(n=2541) | p-value |
|------------------------------------------------------------------------------------|--------------------------|------------------------------|---------|
| Male (%)                                                                           | 53                       | 60                           | <0.001  |
| Hindu (%)                                                                          | 93                       | 94                           | 0.1     |
| Currently chew/smoke tobacco (%)                                                   | 19                       | 21                           | 0.1     |
| Suffered illness <sup>‡</sup> (%)                                                  | 20                       | 16                           | 0.01    |
| Married (%)                                                                        | 98                       | 98                           | 0.8     |
| Mean Age (SD)                                                                      | 42.6 (8.6)               | 43.4 (9.3)                   | <0.001  |
| Median hours to factory from place of origin(1 <sup>st</sup> Q, 3 <sup>rd</sup> Q) | 6 (3, 10)                | 6 (3, 12)                    | 0.3     |

<sup>†</sup> Responders are participants (factory workers or spouse) who attended the clinic along with their rural sibling; non-responders are eligible participants (factory worker or spouse) who did not attend the clinic (the number is three less than that used in the main analyses since three rural siblings came without the factory worker)

<sup>‡</sup> Self-reported high blood pressure, heart disease, diabetes or stroke

**Web table 4. Comparison of Indian Migration Study (IMS) population to the 2001 Census Of India and the 3<sup>rd</sup> National Family Health Survey of India (NFHS-3)**

|                                               | IMS (2005-7)<br>(N=7067) |       |       | CENSUS (2001) <sup>23</sup><br>(N= 1,028,737,436) |         |         | NFHS-3 <sup>†</sup> (2005-6) <sup>35</sup><br>(n=515,507) |         |         |
|-----------------------------------------------|--------------------------|-------|-------|---------------------------------------------------|---------|---------|-----------------------------------------------------------|---------|---------|
|                                               | Urban                    | Rural | Total | Urban                                             | Rural   | Total   | Urban                                                     | Rural   | Total   |
| Age range (years)                             | 18-70                    | 15-76 | 15-76 | 0 - 80+                                           | 0 - 80+ | 0 - 80+ | 0 - 80+                                                   | 0 - 80+ | 0 - 80+ |
| % male                                        | 53.2                     | 67.2  | 58.0  | 52.4                                              | 51.7    | 51.9    | 51.6                                                      | 49.3    | 50.0    |
| % illiterate                                  | 4.5                      | 16.9  | 9.1   | 20.1                                              | 41.3    | 35.2    | 25.3                                                      | 48.6    | 41.5    |
| % not employed <sup>‡</sup>                   | 40.8                     | 29.7  | 37.2  | 67.7                                              | 58.2    | 60.9    | 49.7                                                      | 37.0    | 41.3    |
| Mean household size                           | 4.7                      | 5.7   | 5.1   | 5.1                                               | 5.4     | 5.3     | 4.6                                                       | 4.9     | 4.8     |
| % Hindu religion                              | 89.4                     | 94.3  | 91.2  | 82.6                                              | 75.6    | 80.5    | 78.2                                                      | 83.3    | 81.6    |
| % scheduled caste/tribe <sup>‡</sup>          | 20.2                     | 23.8  | 21.4  | 14.2                                              | 28.3    | 24.4    | 19.1                                                      | 31.8    | 27.6    |
| % with drinking water from pipe/handpump/well | 99.7                     | 98.5  | 99.3  | 97.8                                              | 95.4    | 96.1    | 94.1                                                      | 83.9    | 87.3    |
| % with electric lighting source               | 99.3                     | 86.7  | 94.7  | 87.6                                              | 43.5    | 55.8    | 93.1                                                      | 55.7    | 67.9    |
| % with toilet facility access                 | 98.9                     | 65.2  | 86.6  | 70.4                                              | 22.8    | 36.1    | 83.1                                                      | 25.9    | 44.5    |
| % with Pucca material house                   | 82.7                     | 40.0  | 66.4  | -                                                 | -       | -       | 74.1                                                      | 25.5    | 41.4    |
| % that own agricultural land                  | 21.9                     | 71.4  | 40.0  | -                                                 | -       | -       | 19                                                        | 58.5    | 45.6    |
| % with the following household assets:        |                          |       |       |                                                   |         |         |                                                           |         |         |
| TV                                            | 97.1                     | 71.1  | 87.6  | 64.3                                              | 18.9    | 31.6    | 73.2                                                      | 30.1    | 44.2    |
| Radio                                         | 77.0                     | 60.8  | 71.1  | 44.5                                              | 31.5    | 35.1    | 38.9                                                      | 27.0    | 30.9    |
| Phone                                         | 84.4                     | 46.1  | 70.3  | 23.0                                              | 3.8     | 9.1     | 26.7                                                      | 8.0     | 14.1    |
| Bicycle                                       | 74.6                     | 75.4  | 74.9  | 46.0                                              | 42.8    | 43.7    | 50.1                                                      | 51.6    | 51.1    |
| Scooter                                       | 81.8                     | 40.7  | 66.7  | 24.7                                              | 6.7     | 11.7    | 30.5                                                      | 10.8    | 17.2    |
| Car                                           | 14.4                     | 3.2   | 10.1  | 5.6                                               | 1.3     | 2.5     | 6.1                                                       | 1.0     | 2.7     |

<sup>†</sup> National Family and Household Survey, 3<sup>rd</sup> survey

<sup>‡</sup> Castes and tribes that are recognised by the government as socially and economically disadvantaged

<sup>‡</sup> In IMS this is those self-reporting as unemployed or housewives; in the census it is those classified as “non-workers”; in the NFHS it is those classified as not employed in 12 months preceding the survey
